# Supplementary material for: What happens in the shock room stays in the shock room? A time-based audio/video audit framework for trauma team performance analysis
Source: PubMed Central journal article supplement — Eur J Emerg Med. 2019 Sep 3;27(2):121–4. doi: 10.1097/MEJ.0000000000000627 (PMC7050797; doi:10.1097/mej.0000000000000627), 2019-09-03
Supplement: ejem-27-121-s001.pdf [file ejem-27-121-s001.pdf]

Supplemental digital content

Patient care area (TB1 and TB2)

TB 1

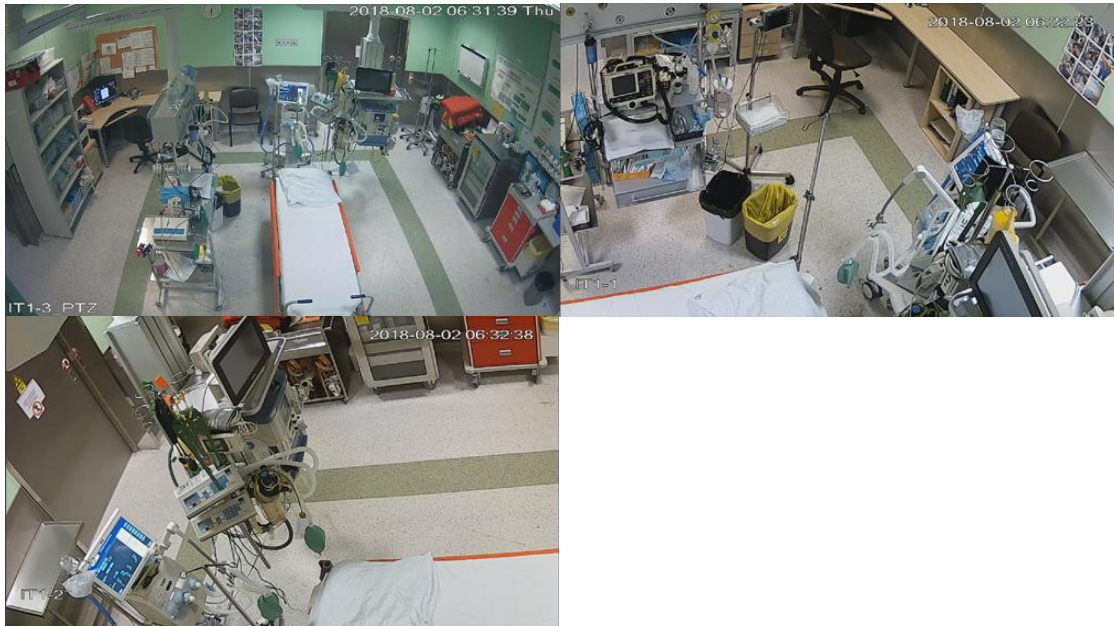

TB 2

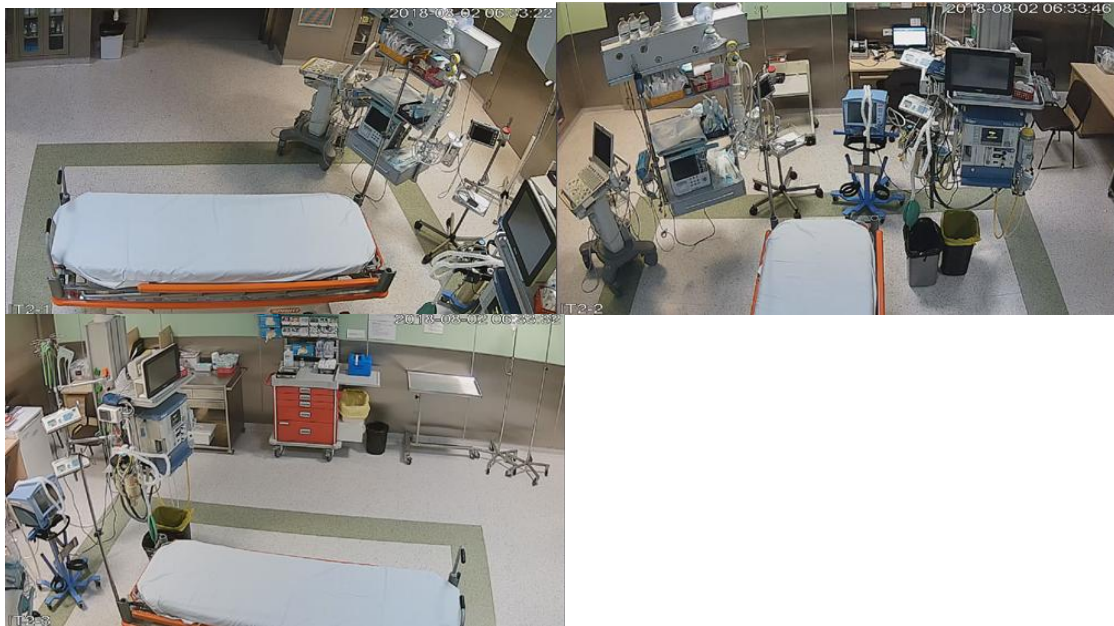

| ATLS compliance rate        | All patients (%) |
|-----------------------------|------------------|
| Chest auscultation          | 115 (80)         |
| Chest palpation             | 78 (55)          |
| Pulse oximeter              | 132 (92)         |
| Heart monitor               | 134 (94)         |
| Blood pressure              | 138 (97)         |
| Abdomen palpation           | 123 (86)         |
| Thigh palpation             | 100 (70)         |
| Pelvic stability            | 104 (73)         |
| Temperature                 | 0 (0)            |
| Protection from hypothermia | 107 (75)         |
| Back examined               | 47 (33)          |

### Examination timings

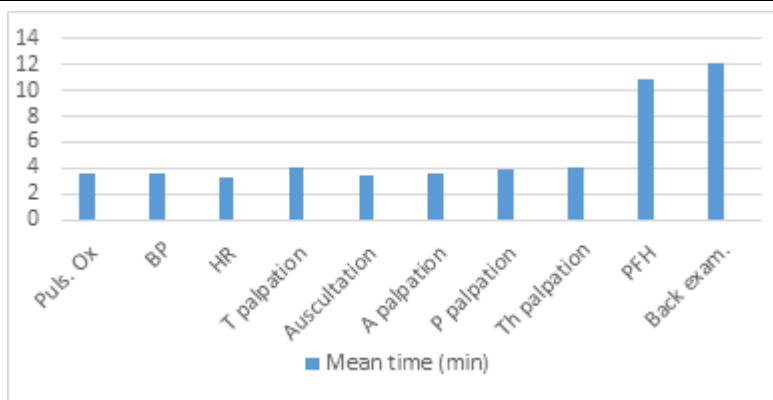

T- thorax, A- abdomen, P- pelvis, BP- blood pressure, HR- heart rate, Th- thigh, PFH- protection from hypothermia

### Imaging timings

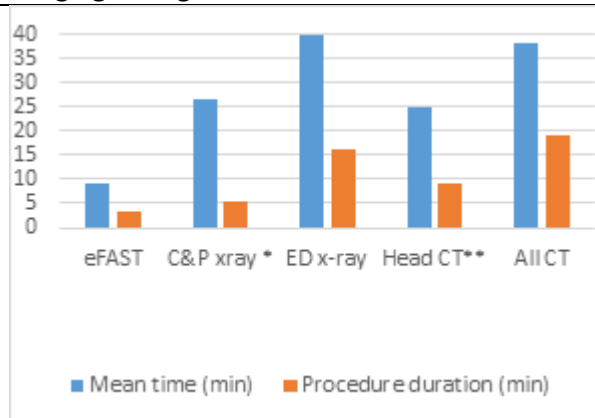

C&P- chest and pelvis, ED- x-rays made not in the trauma bay.

\*only the patients of whom x-rays were made in the shock room (C&P n=24; ED x-ray n=45)

\*\*only the patients of whom only head/neck CT were made (head/neck CT n=51; all CT n=32)

## Procedure timing

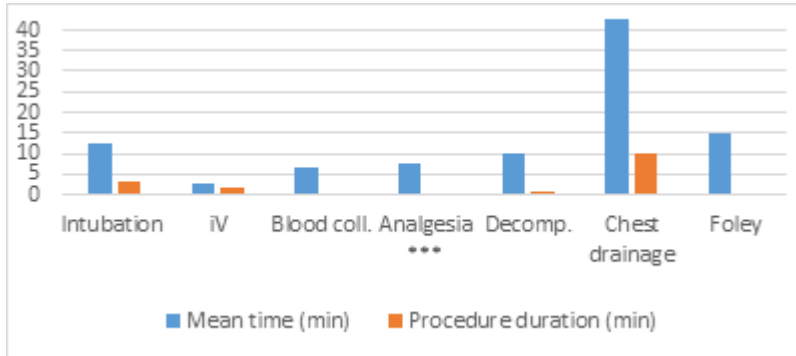

Decomp.- needle decompression

\*\*\*out 51 out of 84 patients of who required analgesia

## Trauma team activation criteria

Red trauma team activation criteria:

1. GCS <9
2. Respiratory rate <8 or > 30
3. Blood pressure <90
4. Saturation < 90%
5. Heart rate >120
6. Stridor
7. Broken two long bones or pelvic fracture
8. Penetrating injury on the neck, chest or waste
9. Suspected internal hemorrhage
10. Flail chest
11. Airway burned or >18% born of body surface
12. Limb amputation higher than palms and feet

Yellow team activation criteria

No red team activation criteria and one of the following:

1. Patient is a pedestrian, cyclist, or motorcyclist, diver
2. Patient was injured during explosion or shootout
3. Patient fell from >3 meters
4. Other emergency services were needed to extract the patient
